# Supplementary material
Source: publisher figshare collection journal article supplement (https://acs.figshare.com/ndownloader/files/4661194)
Supplement: Supplementary file 1 [file 4661194]

data_3 
 
_audit_creation_method            SHELXL-97 
_chemical_name_systematic 
; 
 ? 
; 
_chemical_name_common             ? 
_chemical_melting_point           ? 
_chemical_formula_moiety         'C32 H44 N2 Ni O7 V' 
_chemical_formula_sum            'C32 H44 N2 Ni O7 V' 
_chemical_formula_weight          678.32 
 
loop_ 
 _atom_type_symbol 
 _atom_type_description 
 _atom_type_scat_dispersion_real 
 _atom_type_scat_dispersion_imag 
 _atom_type_scat_source 
 'C'  'C'   0.0033   0.0016 
 'International Tables Vol C Tables 4.2.6.8 and 6.1.1.4' 
 'H'  'H'   0.0000   0.0000 
 'International Tables Vol C Tables 4.2.6.8 and 6.1.1.4' 
 'N'  'N'   0.0061   0.0033 
 'International Tables Vol C Tables 4.2.6.8 and 6.1.1.4' 
 'Ni'  'Ni'   0.3393   1.1124 
 'International Tables Vol C Tables 4.2.6.8 and 6.1.1.4' 
 'O'  'O'   0.0106   0.0060 
 'International Tables Vol C Tables 4.2.6.8 and 6.1.1.4' 
 'V'  'V'   0.3005   0.5294 
 'International Tables Vol C Tables 4.2.6.8 and 6.1.1.4' 
 
_symmetry_cell_setting            monoclinic 
_symmetry_space_group_name_H-M    'P 21/c'
_symmetry_space_group_name_Hall   '-P 2ybc '
 
loop_ 
 _symmetry_equiv_pos_as_xyz 
 'x, y, z' 
 '-x, y+1/2, -z+1/2' 
 '-x, -y, -z' 
 'x, -y-1/2, z-1/2' 
 
_cell_length_a                    11.9355(15) 
_cell_length_b                    18.902(2) 
_cell_length_c                    14.8328(18) 
_cell_angle_alpha                 90 
_cell_angle_beta                  96.672(3) 
_cell_angle_gamma                 90 
_cell_volume                      3323.8(7) 
_cell_formula_units_Z             4 
_cell_measurement_temperature     223(2) 
_cell_measurement_reflns_used     5972  
_cell_measurement_theta_min       2.5 
_cell_measurement_theta_max       26.5 
 
_exptl_crystal_description        block 
_exptl_crystal_colour             green 
_exptl_crystal_size_max           0.32 
_exptl_crystal_size_mid           0.11 
_exptl_crystal_size_min           0.07 
_exptl_crystal_density_meas       ? 
_exptl_crystal_density_diffrn     1.356 
_exptl_crystal_density_method     'not measured' 
_exptl_crystal_F_000              1428 
_exptl_absorpt_coefficient_mu     0.894 
_exptl_absorpt_correction_type    'multi-scan' 
_exptl_absorpt_correction_T_min   0.722 
_exptl_absorpt_correction_T_max   1
_exptl_absorpt_process_details    'SADABS (Bruker, 2000)'
 
_exptl_special_details 
; 
 ? 
; 
 
_diffrn_ambient_temperature       223(2) 
_diffrn_radiation_wavelength      0.71069 
_diffrn_radiation_type            MoK\a 
_diffrn_radiation_source          'fine-focus sealed tube' 
_diffrn_radiation_monochromator   graphite 
_diffrn_measurement_device_type   'Bruker AXS SMART CCD' 
_diffrn_measurement_method        '\w scans' 
_diffrn_detector_area_resol_mean  ? 
_diffrn_standards_number          0 
_diffrn_standards_interval_count  ? 
_diffrn_standards_interval_time   ? 
_diffrn_standards_decay_%         0 
_diffrn_reflns_number             27479 
_diffrn_reflns_av_R_equivalents   0.036 
_diffrn_reflns_av_sigmaI/netI     0.047 
_diffrn_reflns_limit_h_min        -15 
_diffrn_reflns_limit_h_max        16 
_diffrn_reflns_limit_k_min        -26 
_diffrn_reflns_limit_k_max        25 
_diffrn_reflns_limit_l_min        -18 
_diffrn_reflns_limit_l_max        20 
_diffrn_reflns_theta_min          1.7 
_diffrn_reflns_theta_max          30.0 
_reflns_number_total              9687 
_reflns_number_gt                 7343 
_reflns_threshold_expression      'I>2\s(I)' 
 
_computing_data_collection       'SMART (Bruker, 2000)'
_computing_cell_refinement       'SAINT (Bruker, 2000)'
_computing_data_reduction        'SAINT' 
_computing_structure_solution
'PATTY in DIRDIF92 (Beurskens et al., 1992)' 
_computing_structure_refinement  'SHELXL-97 (Sheldrick, 1997)' 
_computing_molecular_graphics    'ORTEPII (Johnson, 1976)' 
_computing_publication_material  'SHELXL-97 (Sheldrick, 1997)'
 
_refine_special_details 
; 
 Refinement of F^2^ against ALL reflections.  The weighted R-factor wR and 
 goodness of fit S are based on F^2^, conventional R-factors R are based 
 on F, with F set to zero for negative F^2^. The threshold expression of 
 F^2^ > 2sigma(F^2^) is used only for calculating R-factors(gt) etc. and is 
 not relevant to the choice of reflections for refinement.  R-factors based 
 on F^2^ are statistically about twice as large as those based on F, and R- 
 factors based on ALL data will be even larger. 
; 
 
_refine_ls_structure_factor_coef  Fsqd  
_refine_ls_matrix_type            full 
_refine_ls_weighting_scheme       calc  
_refine_ls_weighting_details 
 'calc w=1/[\s^2^(Fo^2^)+(0.0571P)^2^] where P=(Fo^2^+2Fc^2^)/3' 
_atom_sites_solution_primary      direct 
_atom_sites_solution_secondary    difmap 
_atom_sites_solution_hydrogens    geom 
_refine_ls_hydrogen_treatment     constr 
_refine_ls_extinction_method      none 
_refine_ls_extinction_coef        ? 
_refine_ls_number_reflns          9687 
_refine_ls_number_parameters      396 
_refine_ls_number_restraints      0 
_refine_ls_R_factor_all           0.058 
_refine_ls_R_factor_gt            0.040 
_refine_ls_wR_factor_ref          0.106 
_refine_ls_wR_factor_gt           0.098 
_refine_ls_goodness_of_fit_ref    1.02 
_refine_ls_restrained_S_all       1.02 
_refine_ls_shift/su_max           0.001 
_refine_ls_shift/su_mean          0.000 
 
loop_ 
 _atom_site_label 
 _atom_site_type_symbol 
 _atom_site_fract_x 
 _atom_site_fract_y 
 _atom_site_fract_z 
 _atom_site_U_iso_or_equiv 
 _atom_site_adp_type 
 _atom_site_occupancy 
 _atom_site_symmetry_multiplicity 
 _atom_site_calc_flag 
 _atom_site_refinement_flags 
 _atom_site_disorder_assembly 
 _atom_site_disorder_group 
Ni Ni 0.172152(18) 0.014857(11) 0.259119(14) 0.02176(7) Uani 1 1 d . . . 
V V 0.10203(3) -0.129111(15) 0.30845(2) 0.02568(8) Uani 1 1 d . . . 
O1 O 0.02684(9) -0.05058(6) 0.23577(8) 0.0235(2) Uani 1 1 d . . . 
O2 O 0.23986(10) -0.08364(6) 0.26925(8) 0.0249(2) Uani 1 1 d . . . 
O3 O 0.32122(11) 0.06240(7) 0.29528(8) 0.0298(3) Uani 1 1 d . . . 
O4 O 0.14774(11) -0.00193(7) 0.38955(8) 0.0304(3) Uani 1 1 d . . . 
O5 O 0.18290(11) -0.15741(7) 0.42756(9) 0.0327(3) Uani 1 1 d . . . 
O6 O -0.03988(11) -0.14053(7) 0.36469(9) 0.0338(3) Uani 1 1 d . . . 
O7 O 0.10057(12) -0.20013(7) 0.25079(9) 0.0370(3) Uani 1 1 d . . . 
N1 N 0.07351(12) 0.10597(7) 0.24182(10) 0.0266(3) Uani 1 1 d . . . 
N2 N 0.18053(12) 0.02251(7) 0.11964(9) 0.0235(3) Uani 1 1 d . . . 
C1 C -0.08239(14) -0.02995(9) 0.21735(11) 0.0227(3) Uani 1 1 d . . . 
C2 C -0.11338(14) 0.04007(9) 0.23461(11) 0.0243(3) Uani 1 1 d . . . 
C3 C -0.22623(15) 0.06068(10) 0.21348(12) 0.0288(4) Uani 1 1 d . . . 
H3 H -0.2464 0.1078 0.2236 0.035 Uiso 1 1 calc R . . 
C4 C -0.30882(15) 0.01377(10) 0.17817(12) 0.0311(4) Uani 1 1 d . . . 
C5 C -0.27509(15) -0.05422(10) 0.15977(12) 0.0303(4) Uani 1 1 d . . . 
H5 H -0.3300 -0.0867 0.1352 0.036 Uiso 1 1 calc R . . 
C6 C -0.16440(15) -0.07642(9) 0.17588(11) 0.0259(3) Uani 1 1 d . . . 
C7 C -0.03350(15) 0.09310(9) 0.28201(12) 0.0277(4) Uani 1 1 d . . . 
H7A H -0.0734 0.1383 0.2839 0.033 Uiso 1 1 calc R . . 
H7B H -0.0141 0.0774 0.3449 0.033 Uiso 1 1 calc R . . 
C8 C -0.43126(17) 0.03452(13) 0.15908(15) 0.0434(5) Uani 1 1 d . . . 
H8A H -0.4580 0.0245 0.0961 0.065 Uiso 1 1 calc R . . 
H8B H -0.4392 0.0847 0.1707 0.065 Uiso 1 1 calc R . . 
H8C H -0.4754 0.0077 0.1982 0.065 Uiso 1 1 calc R . . 
C9 C -0.13439(17) -0.15021(9) 0.14947(14) 0.0359(4) Uani 1 1 d . . . 
H9A H -0.1221 -0.1795 0.2034 0.054 Uiso 1 1 calc R . . 
H9B H -0.0662 -0.1489 0.1198 0.054 Uiso 1 1 calc R . . 
H9C H -0.1956 -0.1698 0.1082 0.054 Uiso 1 1 calc R . . 
C10 C 0.12897(18) 0.16636(10) 0.29150(15) 0.0387(5) Uani 1 1 d . . . 
H10A H 0.1991 0.1771 0.2673 0.058 Uiso 1 1 calc R . . 
H10B H 0.1446 0.1545 0.3553 0.058 Uiso 1 1 calc R . . 
H10C H 0.0797 0.2073 0.2846 0.058 Uiso 1 1 calc R . . 
C11 C 0.05365(16) 0.12224(9) 0.14274(13) 0.0314(4) Uani 1 1 d . . . 
H11A H 0.1045 0.1603 0.1285 0.038 Uiso 1 1 calc R . . 
H11B H -0.0241 0.1387 0.1274 0.038 Uiso 1 1 calc R . . 
C12 C 0.07352(14) 0.05758(9) 0.08608(12) 0.0273(4) Uani 1 1 d . . . 
H12A H 0.0111 0.0242 0.0882 0.033 Uiso 1 1 calc R . . 
H12B H 0.0753 0.0718 0.0227 0.033 Uiso 1 1 calc R . . 
C13 C 0.27727(15) 0.06399(10) 0.09425(12) 0.0299(4) Uani 1 1 d . . . 
H13A H 0.3471 0.0406 0.1171 0.045 Uiso 1 1 calc R . . 
H13B H 0.2758 0.1110 0.1203 0.045 Uiso 1 1 calc R . . 
H13C H 0.2723 0.0676 0.0287 0.045 Uiso 1 1 calc R . . 
C14 C 0.18367(15) -0.05002(9) 0.07981(11) 0.0269(4) Uani 1 1 d . . . 
H14A H 0.1817 -0.0460 0.0138 0.032 Uiso 1 1 calc R . . 
H14B H 0.1161 -0.0759 0.0924 0.032 Uiso 1 1 calc R . . 
C15 C 0.28645(14) -0.09170(9) 0.11625(12) 0.0255(3) Uani 1 1 d . . . 
C16 C 0.30844(15) -0.10738(9) 0.20897(12) 0.0252(3) Uani 1 1 d . . . 
C17 C 0.40429(16) -0.14677(10) 0.24074(13) 0.0317(4) Uani 1 1 d . . . 
C18 C 0.47319(16) -0.17237(10) 0.17866(14) 0.0350(4) Uani 1 1 d . . . 
H18 H 0.5367 -0.1996 0.2000 0.042 Uiso 1 1 calc R . . 
C19 C 0.45145(16) -0.15915(9) 0.08611(14) 0.0318(4) Uani 1 1 d . . . 
C20 C 0.35879(16) -0.11787(10) 0.05666(13) 0.0300(4) Uani 1 1 d . . . 
H20 H 0.3440 -0.1071 -0.0054 0.036 Uiso 1 1 calc R . . 
C21 C 0.4312(2) -0.16021(14) 0.34100(15) 0.0542(6) Uani 1 1 d . . . 
H21A H 0.4266 -0.1161 0.3739 0.081 Uiso 1 1 calc R . . 
H21B H 0.5069 -0.1794 0.3531 0.081 Uiso 1 1 calc R . . 
H21C H 0.3775 -0.1938 0.3606 0.081 Uiso 1 1 calc R . . 
C22 C 0.52481(18) -0.19009(11) 0.01933(15) 0.0427(5) Uani 1 1 d . . . 
H22A H 0.5896 -0.2133 0.0522 0.064 Uiso 1 1 calc R . . 
H22B H 0.5503 -0.1525 -0.0179 0.064 Uiso 1 1 calc R . . 
H22C H 0.4816 -0.2243 -0.0191 0.064 Uiso 1 1 calc R . . 
C23 C 0.36948(16) 0.06542(10) 0.37527(12) 0.0308(4) Uani 1 1 d . . . 
C24 C 0.32520(17) 0.04232(11) 0.45372(12) 0.0352(4) Uani 1 1 d . . . 
H24 H 0.3711 0.0484 0.5091 0.042 Uiso 1 1 calc R . . 
C25 C 0.22007(18) 0.01131(9) 0.45782(12) 0.0307(4) Uani 1 1 d . . . 
C26 C 0.48598(19) 0.09854(14) 0.38643(15) 0.0501(6) Uani 1 1 d . . . 
H26A H 0.5369 0.0697 0.3556 0.075 Uiso 1 1 calc R . . 
H26B H 0.5136 0.1014 0.4505 0.075 Uiso 1 1 calc R . . 
H26C H 0.4820 0.1457 0.3604 0.075 Uiso 1 1 calc R . . 
C27 C 0.1841(2) -0.00712(11) 0.54905(13) 0.0411(5) Uani 1 1 d . . . 
H27A H 0.1242 0.0245 0.5623 0.062 Uiso 1 1 calc R . . 
H27B H 0.2479 -0.0022 0.5955 0.062 Uiso 1 1 calc R . . 
H27C H 0.1572 -0.0556 0.5481 0.062 Uiso 1 1 calc R . . 
C28 C 0.14369(17) -0.19117(9) 0.49156(12) 0.0310(4) Uani 1 1 d . . . 
C29 C 0.03022(18) -0.20684(10) 0.49334(13) 0.0343(4) Uani 1 1 d . . . 
H29 H 0.0107 -0.2371 0.5393 0.041 Uiso 1 1 calc R . . 
C31 C 0.2293(2) -0.21166(11) 0.56925(14) 0.0436(5) Uani 1 1 d . . . 
H31A H 0.2876 -0.2403 0.5469 0.065 Uiso 1 1 calc R . . 
H31B H 0.1927 -0.2386 0.6133 0.065 Uiso 1 1 calc R . . 
H31C H 0.2629 -0.1693 0.5979 0.065 Uiso 1 1 calc R . . 
C30 C -0.05597(17) -0.18064(9) 0.43171(13) 0.0314(4) Uani 1 1 d . . . 
C32 C -0.17698(18) -0.19629(11) 0.44141(15) 0.0411(5) Uani 1 1 d . . . 
H32A H -0.2139 -0.1535 0.4587 0.062 Uiso 1 1 calc R . . 
H32B H -0.1810 -0.2321 0.4877 0.062 Uiso 1 1 calc R . . 
H32C H -0.2145 -0.2134 0.3840 0.062 Uiso 1 1 calc R . . 
 
loop_ 
 _atom_site_aniso_label 
 _atom_site_aniso_U_11 
 _atom_site_aniso_U_22 
 _atom_site_aniso_U_33 
 _atom_site_aniso_U_23 
 _atom_site_aniso_U_13 
 _atom_site_aniso_U_12 
Ni 0.02160(11) 0.02212(11) 0.02127(11) 0.00179(8) 0.00122(8) -0.00101(8) 
V 0.02597(16) 0.02436(15) 0.02769(16) 0.00568(12) 0.00719(12) 0.00323(11) 
O1 0.0204(6) 0.0213(6) 0.0285(6) 0.0024(5) 0.0015(5) 0.0000(4) 
O2 0.0243(6) 0.0267(6) 0.0245(6) 0.0030(5) 0.0055(5) 0.0038(5) 
O3 0.0274(7) 0.0354(7) 0.0258(6) 0.0004(5) -0.0002(5) -0.0051(5) 
O4 0.0307(7) 0.0363(7) 0.0248(6) 0.0046(5) 0.0052(5) 0.0009(5) 
O5 0.0337(7) 0.0320(7) 0.0334(7) 0.0098(5) 0.0085(6) 0.0044(6) 
O6 0.0303(7) 0.0368(7) 0.0361(7) 0.0088(6) 0.0111(6) 0.0033(6) 
O7 0.0377(8) 0.0279(7) 0.0470(8) 0.0000(6) 0.0112(6) 0.0028(6) 
N1 0.0267(8) 0.0211(7) 0.0314(8) -0.0009(6) 0.0011(6) -0.0031(6) 
N2 0.0208(7) 0.0259(7) 0.0230(7) 0.0025(5) -0.0004(5) -0.0014(5) 
C1 0.0202(8) 0.0263(8) 0.0217(8) 0.0046(6) 0.0032(6) 0.0002(6) 
C2 0.0230(8) 0.0275(8) 0.0227(8) 0.0015(6) 0.0047(6) 0.0006(7) 
C3 0.0275(9) 0.0322(9) 0.0271(9) 0.0026(7) 0.0049(7) 0.0066(7) 
C4 0.0227(9) 0.0443(11) 0.0267(9) 0.0045(8) 0.0050(7) 0.0000(8) 
C5 0.0240(9) 0.0378(10) 0.0286(9) 0.0016(8) 0.0005(7) -0.0061(7) 
C6 0.0265(9) 0.0273(8) 0.0240(8) 0.0018(7) 0.0035(7) -0.0038(7) 
C7 0.0275(9) 0.0247(8) 0.0309(9) -0.0034(7) 0.0036(7) 0.0020(7) 
C8 0.0239(10) 0.0616(14) 0.0446(12) 0.0053(10) 0.0035(9) 0.0041(9) 
C9 0.0398(11) 0.0258(9) 0.0402(11) -0.0040(8) -0.0032(9) -0.0059(8) 
C10 0.0371(11) 0.0235(9) 0.0541(12) -0.0090(8) -0.0011(9) -0.0052(8) 
C11 0.0288(9) 0.0274(9) 0.0376(10) 0.0095(8) 0.0022(8) 0.0016(7) 
C12 0.0227(8) 0.0332(9) 0.0251(8) 0.0076(7) -0.0015(7) 0.0004(7) 
C13 0.0244(9) 0.0383(10) 0.0271(9) 0.0072(7) 0.0030(7) -0.0057(7) 
C14 0.0256(9) 0.0323(9) 0.0220(8) -0.0020(7) -0.0012(7) -0.0017(7) 
C15 0.0234(8) 0.0258(8) 0.0269(8) -0.0006(7) 0.0015(7) -0.0023(7) 
C16 0.0246(8) 0.0241(8) 0.0274(8) 0.0004(7) 0.0049(7) -0.0014(6) 
C17 0.0268(9) 0.0342(9) 0.0346(10) 0.0059(8) 0.0058(7) 0.0032(7) 
C18 0.0260(9) 0.0328(10) 0.0473(12) 0.0034(8) 0.0091(8) 0.0043(7) 
C19 0.0269(9) 0.0264(9) 0.0438(11) -0.0069(8) 0.0114(8) -0.0036(7) 
C20 0.0302(9) 0.0323(9) 0.0285(9) -0.0037(7) 0.0073(7) -0.0043(7) 
C21 0.0439(13) 0.0799(17) 0.0393(12) 0.0221(12) 0.0071(10) 0.0284(12) 
C22 0.0358(11) 0.0416(11) 0.0538(13) -0.0140(10) 0.0183(10) -0.0020(9) 
C23 0.0281(9) 0.0316(9) 0.0312(9) -0.0047(7) -0.0022(8) -0.0014(7) 
C24 0.0374(11) 0.0439(11) 0.0227(9) -0.0023(8) -0.0032(8) 0.0006(9) 
C25 0.0401(11) 0.0299(9) 0.0227(9) 0.0015(7) 0.0058(7) 0.0084(8) 
C26 0.0363(12) 0.0724(16) 0.0392(12) -0.0043(11) -0.0061(9) -0.0185(11) 
C27 0.0548(14) 0.0446(11) 0.0251(10) 0.0039(8) 0.0093(9) 0.0045(10) 
C28 0.0444(11) 0.0210(8) 0.0289(9) 0.0032(7) 0.0096(8) 0.0070(8) 
C29 0.0453(11) 0.0269(9) 0.0326(10) 0.0062(7) 0.0124(8) -0.0010(8) 
C31 0.0516(13) 0.0412(11) 0.0383(11) 0.0133(9) 0.0071(10) 0.0141(10) 
C30 0.0396(11) 0.0223(8) 0.0351(10) -0.0026(7) 0.0165(8) -0.0023(7) 
C32 0.0413(12) 0.0376(10) 0.0478(12) 0.0000(9) 0.0195(10) -0.0062(9) 
 
_geom_special_details 
; 
 All esds (except the esd in the dihedral angle between two l.s. planes) 
 are estimated using the full covariance matrix.  The cell esds are taken 
 into account individually in the estimation of esds in distances, angles 
 and torsion angles; correlations between esds in cell parameters are only 
 used when they are defined by crystal symmetry.  An approximate (isotropic) 
 treatment of cell esds is used for estimating esds involving l.s. planes. 
; 
 
loop_ 
 _geom_bond_atom_site_label_1 
 _geom_bond_atom_site_label_2 
 _geom_bond_distance 
 _geom_bond_site_symmetry_2 
 _geom_bond_publ_flag 
Ni O3 2.0098(13) . ? 
Ni O4 2.0148(12) . ? 
Ni O2 2.0283(12) . ? 
Ni N1 2.0851(15) . ? 
Ni N2 2.0879(14) . ? 
Ni O1 2.1257(12) . ? 
Ni V 2.9637(5) . ? 
V O7 1.5907(13) . ? 
V O6 1.9849(13) . ? 
V O5 1.9857(13) . ? 
V O1 1.9864(12) . ? 
V O2 2.0013(12) . ? 
O1 C1 1.358(2) . ? 
O2 C16 1.357(2) . ? 
O3 C23 1.259(2) . ? 
O4 C25 1.277(2) . ? 
O5 C28 1.277(2) . ? 
O6 C30 1.282(2) . ? 
N1 C10 1.473(2) . ? 
N1 C7 1.491(2) . ? 
N1 C11 1.493(2) . ? 
N2 C12 1.473(2) . ? 
N2 C13 1.480(2) . ? 
N2 C14 1.495(2) . ? 
C1 C6 1.403(2) . ? 
C1 C2 1.406(2) . ? 
C2 C3 1.402(2) . ? 
C2 C7 1.501(2) . ? 
C3 C4 1.383(3) . ? 
C3 H3 0.9400 . ? 
C4 C5 1.383(3) . ? 
C4 C8 1.508(3) . ? 
C5 C6 1.380(2) . ? 
C5 H5 0.9400 . ? 
C6 C9 1.503(2) . ? 
C7 H7A 0.9800 . ? 
C7 H7B 0.9800 . ? 
C8 H8A 0.9700 . ? 
C8 H8B 0.9700 . ? 
C8 H8C 0.9700 . ? 
C9 H9A 0.9700 . ? 
C9 H9B 0.9700 . ? 
C9 H9C 0.9700 . ? 
C10 H10A 0.9700 . ? 
C10 H10B 0.9700 . ? 
C10 H10C 0.9700 . ? 
C11 C12 1.518(3) . ? 
C11 H11A 0.9800 . ? 
C11 H11B 0.9800 . ? 
C12 H12A 0.9800 . ? 
C12 H12B 0.9800 . ? 
C13 H13A 0.9700 . ? 
C13 H13B 0.9700 . ? 
C13 H13C 0.9700 . ? 
C14 C15 1.505(2) . ? 
C14 H14A 0.9800 . ? 
C14 H14B 0.9800 . ? 
C15 C20 1.396(2) . ? 
C15 C16 1.401(2) . ? 
C16 C17 1.400(3) . ? 
C17 C18 1.391(3) . ? 
C17 C21 1.506(3) . ? 
C18 C19 1.390(3) . ? 
C18 H18 0.9400 . ? 
C19 C20 1.382(3) . ? 
C19 C22 1.514(3) . ? 
C20 H20 0.9400 . ? 
C21 H21A 0.9700 . ? 
C21 H21B 0.9700 . ? 
C21 H21C 0.9700 . ? 
C22 H22A 0.9700 . ? 
C22 H22B 0.9700 . ? 
C22 H22C 0.9700 . ? 
C23 C24 1.403(3) . ? 
C23 C26 1.516(3) . ? 
C24 C25 1.393(3) . ? 
C24 H24 0.9400 . ? 
C25 C27 1.507(3) . ? 
C26 H26A 0.9700 . ? 
C26 H26B 0.9700 . ? 
C26 H26C 0.9700 . ? 
C27 H27A 0.9700 . ? 
C27 H27B 0.9700 . ? 
C27 H27C 0.9700 . ? 
C28 C29 1.390(3) . ? 
C28 C31 1.499(3) . ? 
C29 C30 1.386(3) . ? 
C29 H29 0.9400 . ? 
C31 H31A 0.9700 . ? 
C31 H31B 0.9700 . ? 
C31 H31C 0.9700 . ? 
C30 C32 1.497(3) . ? 
C32 H32A 0.9700 . ? 
C32 H32B 0.9700 . ? 
C32 H32C 0.9700 . ? 
 
loop_ 
 _geom_angle_atom_site_label_1 
 _geom_angle_atom_site_label_2 
 _geom_angle_atom_site_label_3 
 _geom_angle 
 _geom_angle_site_symmetry_1 
 _geom_angle_site_symmetry_3 
 _geom_angle_publ_flag 
O3 Ni O4 92.09(5) . . ? 
O3 Ni O2 93.32(5) . . ? 
O4 Ni O2 83.40(5) . . ? 
O3 Ni N1 97.65(5) . . ? 
O4 Ni N1 96.06(6) . . ? 
O2 Ni N1 169.02(5) . . ? 
O3 Ni N2 95.20(5) . . ? 
O4 Ni N2 172.44(5) . . ? 
O2 Ni N2 94.15(5) . . ? 
N1 Ni N2 84.96(6) . . ? 
O3 Ni O1 169.72(5) . . ? 
O4 Ni O1 81.87(5) . . ? 
O2 Ni O1 77.78(5) . . ? 
N1 Ni O1 91.27(5) . . ? 
N2 Ni O1 90.63(5) . . ? 
O3 Ni V 127.69(4) . . ? 
O4 Ni V 62.73(4) . . ? 
O2 Ni V 42.30(3) . . ? 
N1 Ni V 128.11(4) . . ? 
N2 Ni V 110.83(4) . . ? 
O1 Ni V 42.05(3) . . ? 
O7 V O6 100.23(6) . . ? 
O7 V O5 103.00(6) . . ? 
O6 V O5 86.97(5) . . ? 
O7 V O1 111.27(6) . . ? 
O6 V O1 87.45(5) . . ? 
O5 V O1 145.73(5) . . ? 
O7 V O2 99.46(6) . . ? 
O6 V O2 159.91(5) . . ? 
O5 V O2 92.47(5) . . ? 
O1 V O2 81.73(5) . . ? 
O7 V Ni 128.90(5) . . ? 
O6 V Ni 118.87(4) . . ? 
O5 V Ni 110.18(4) . . ? 
O1 V Ni 45.78(3) . . ? 
O2 V Ni 43.01(3) . . ? 
C1 O1 V 133.35(10) . . ? 
C1 O1 Ni 127.72(10) . . ? 
V O1 Ni 92.17(5) . . ? 
C16 O2 V 128.95(10) . . ? 
C16 O2 Ni 121.36(10) . . ? 
V O2 Ni 94.69(5) . . ? 
C23 O3 Ni 124.46(12) . . ? 
C25 O4 Ni 124.80(12) . . ? 
C28 O5 V 127.86(13) . . ? 
C30 O6 V 127.02(12) . . ? 
C10 N1 C7 106.40(14) . . ? 
C10 N1 C11 110.08(14) . . ? 
C7 N1 C11 112.44(14) . . ? 
C10 N1 Ni 111.34(12) . . ? 
C7 N1 Ni 108.28(10) . . ? 
C11 N1 Ni 108.30(11) . . ? 
C12 N2 C13 110.30(13) . . ? 
C12 N2 C14 109.86(13) . . ? 
C13 N2 C14 109.21(14) . . ? 
C12 N2 Ni 103.09(10) . . ? 
C13 N2 Ni 114.67(10) . . ? 
C14 N2 Ni 109.53(10) . . ? 
O1 C1 C6 120.87(15) . . ? 
O1 C1 C2 120.04(15) . . ? 
C6 C1 C2 118.98(16) . . ? 
C3 C2 C1 119.15(16) . . ? 
C3 C2 C7 117.43(16) . . ? 
C1 C2 C7 123.22(15) . . ? 
C4 C3 C2 122.04(17) . . ? 
C4 C3 H3 119.0 . . ? 
C2 C3 H3 119.0 . . ? 
C3 C4 C5 117.35(17) . . ? 
C3 C4 C8 122.47(18) . . ? 
C5 C4 C8 120.17(18) . . ? 
C6 C5 C4 122.88(17) . . ? 
C6 C5 H5 118.6 . . ? 
C4 C5 H5 118.6 . . ? 
C5 C6 C1 119.37(16) . . ? 
C5 C6 C9 119.29(16) . . ? 
C1 C6 C9 121.33(16) . . ? 
N1 C7 C2 116.67(14) . . ? 
N1 C7 H7A 108.1 . . ? 
C2 C7 H7A 108.1 . . ? 
N1 C7 H7B 108.1 . . ? 
C2 C7 H7B 108.1 . . ? 
H7A C7 H7B 107.3 . . ? 
C4 C8 H8A 109.5 . . ? 
C4 C8 H8B 109.5 . . ? 
H8A C8 H8B 109.5 . . ? 
C4 C8 H8C 109.5 . . ? 
H8A C8 H8C 109.5 . . ? 
H8B C8 H8C 109.5 . . ? 
C6 C9 H9A 109.5 . . ? 
C6 C9 H9B 109.5 . . ? 
H9A C9 H9B 109.5 . . ? 
C6 C9 H9C 109.5 . . ? 
H9A C9 H9C 109.5 . . ? 
H9B C9 H9C 109.5 . . ? 
N1 C10 H10A 109.5 . . ? 
N1 C10 H10B 109.5 . . ? 
H10A C10 H10B 109.5 . . ? 
N1 C10 H10C 109.5 . . ? 
H10A C10 H10C 109.5 . . ? 
H10B C10 H10C 109.5 . . ? 
N1 C11 C12 111.23(14) . . ? 
N1 C11 H11A 109.4 . . ? 
C12 C11 H11A 109.4 . . ? 
N1 C11 H11B 109.4 . . ? 
C12 C11 H11B 109.4 . . ? 
H11A C11 H11B 108.0 . . ? 
N2 C12 C11 111.12(14) . . ? 
N2 C12 H12A 109.4 . . ? 
C11 C12 H12A 109.4 . . ? 
N2 C12 H12B 109.4 . . ? 
C11 C12 H12B 109.4 . . ? 
H12A C12 H12B 108.0 . . ? 
N2 C13 H13A 109.5 . . ? 
N2 C13 H13B 109.5 . . ? 
H13A C13 H13B 109.5 . . ? 
N2 C13 H13C 109.5 . . ? 
H13A C13 H13C 109.5 . . ? 
H13B C13 H13C 109.5 . . ? 
N2 C14 C15 113.27(14) . . ? 
N2 C14 H14A 108.9 . . ? 
C15 C14 H14A 108.9 . . ? 
N2 C14 H14B 108.9 . . ? 
C15 C14 H14B 108.9 . . ? 
H14A C14 H14B 107.7 . . ? 
C20 C15 C16 119.16(17) . . ? 
C20 C15 C14 119.77(16) . . ? 
C16 C15 C14 121.01(15) . . ? 
O2 C16 C17 119.08(16) . . ? 
O2 C16 C15 121.22(15) . . ? 
C17 C16 C15 119.69(16) . . ? 
C18 C17 C16 119.01(17) . . ? 
C18 C17 C21 121.36(18) . . ? 
C16 C17 C21 119.63(17) . . ? 
C19 C18 C17 122.31(18) . . ? 
C19 C18 H18 118.8 . . ? 
C17 C18 H18 118.8 . . ? 
C20 C19 C18 117.67(17) . . ? 
C20 C19 C22 120.91(18) . . ? 
C18 C19 C22 121.40(18) . . ? 
C19 C20 C15 122.07(18) . . ? 
C19 C20 H20 119.0 . . ? 
C15 C20 H20 119.0 . . ? 
C17 C21 H21A 109.5 . . ? 
C17 C21 H21B 109.5 . . ? 
H21A C21 H21B 109.5 . . ? 
C17 C21 H21C 109.5 . . ? 
H21A C21 H21C 109.5 . . ? 
H21B C21 H21C 109.5 . . ? 
C19 C22 H22A 109.5 . . ? 
C19 C22 H22B 109.5 . . ? 
H22A C22 H22B 109.5 . . ? 
C19 C22 H22C 109.5 . . ? 
H22A C22 H22C 109.5 . . ? 
H22B C22 H22C 109.5 . . ? 
O3 C23 C24 126.36(18) . . ? 
O3 C23 C26 115.79(17) . . ? 
C24 C23 C26 117.85(17) . . ? 
C25 C24 C23 126.55(17) . . ? 
C25 C24 H24 116.7 . . ? 
C23 C24 H24 116.7 . . ? 
O4 C25 C24 125.28(16) . . ? 
O4 C25 C27 115.47(19) . . ? 
C24 C25 C27 119.23(18) . . ? 
C23 C26 H26A 109.5 . . ? 
C23 C26 H26B 109.5 . . ? 
H26A C26 H26B 109.5 . . ? 
C23 C26 H26C 109.5 . . ? 
H26A C26 H26C 109.5 . . ? 
H26B C26 H26C 109.5 . . ? 
C25 C27 H27A 109.5 . . ? 
C25 C27 H27B 109.5 . . ? 
H27A C27 H27B 109.5 . . ? 
C25 C27 H27C 109.5 . . ? 
H27A C27 H27C 109.5 . . ? 
H27B C27 H27C 109.5 . . ? 
O5 C28 C29 124.25(18) . . ? 
O5 C28 C31 115.13(18) . . ? 
C29 C28 C31 120.59(17) . . ? 
C30 C29 C28 124.18(17) . . ? 
C30 C29 H29 117.9 . . ? 
C28 C29 H29 117.9 . . ? 
C28 C31 H31A 109.5 . . ? 
C28 C31 H31B 109.5 . . ? 
H31A C31 H31B 109.5 . . ? 
C28 C31 H31C 109.5 . . ? 
H31A C31 H31C 109.5 . . ? 
H31B C31 H31C 109.5 . . ? 
O6 C30 C29 123.78(18) . . ? 
O6 C30 C32 115.10(18) . . ? 
C29 C30 C32 121.09(17) . . ? 
C30 C32 H32A 109.5 . . ? 
C30 C32 H32B 109.5 . . ? 
H32A C32 H32B 109.5 . . ? 
C30 C32 H32C 109.5 . . ? 
H32A C32 H32C 109.5 . . ? 
H32B C32 H32C 109.5 . . ? 
 
_diffrn_measured_fraction_theta_max    0.996 
_diffrn_reflns_theta_full              30.0 
_diffrn_measured_fraction_theta_full   0.996 
_refine_diff_density_max    0.48 
_refine_diff_density_min   -0.26 
_refine_diff_density_rms    0.070 
